# Supplementary material for: Development of a Versatile Lipid Core for Nanostructured Lipid Carriers (NLCs) Using Design of Experiments (DoE) and Raman Mapping
Source: MDPI journal article supplement (doi:10.3390/pharmaceutics16020250), 2024-02-08
Supplement: s1 [file s1]

## Article

# Supplementary Materials: Development of a Versatile Lipid Core for Nanostructured Lipid Carriers (NLCs) Using Design of Experiments (DoE) and Raman Mapping

Carlos Alberto Rios, Roberta Ondei and Márcia Cristina Breitkreitz

**Table S1.** Drugs and (% w/w) used in the preparation of tablets

| Drug                    | Mixture<br>(% w/w) | Mass of<br>drugs<br>(mg) | Mass<br>tablet<br>(g) | LogP   |
|-------------------------|--------------------|--------------------------|-----------------------|--------|
| Caffeine                | 10.0               | 300.0                    |                       | -0.070 |
| Acetaminophen           | 10.0               | 300.0                    |                       | 0.910  |
| Butamben                | 5.0                | 150.0                    |                       | 2.870  |
| Resveratrol             | 3.0                | 90.0                     | 3.0                   | 3.100  |
| Tacrolimus              | 1.0                | 30.0                     |                       | 3.300  |
| Atorvastatin<br>calcium | 10.0               | 300.0                    |                       | 6.360  |
| Coenzyme Q10            | 3.0                | 90.0                     |                       | 10.000 |

**Table S2.** Classification of excipients according to behavior in water

| Excipients analyzed |                                         |                                                                     |                                        |
|---------------------|-----------------------------------------|---------------------------------------------------------------------|----------------------------------------|
|                     | Hydrophobic                             | Medium<br>Polarity                                                  | Hydrophilic                            |
| <b>Liquid</b>       | (1) SR <sup>TM</sup> Sesame Oil         | (6) SR <sup>TM</sup> Lauryl<br>Lactate<br>(7) SR <sup>TM</sup> PGMC | (9) SR <sup>TM</sup> DMI               |
|                     | (2) SR <sup>TM</sup> Soybean Oil        |                                                                     | (10) SR <sup>TM</sup> PEG 400          |
|                     | (3) SR <sup>TM</sup> Oleic Acid         |                                                                     | (11) SR <sup>TM</sup> Propylene Glycol |
|                     | (4) SR <sup>TM</sup> GTCC               |                                                                     |                                        |
| <b>Solid</b>        | (5) Crodamol <sup>TM</sup> CP<br>pharma | (8) SR <sup>TM</sup> GMCC (S)                                       | (12) Croduret <sup>TM</sup> 40 (S)     |
|                     |                                         |                                                                     | (13) Crodasol <sup>TM</sup> HS HP (S)  |

SR<sup>TM</sup> = Super Refined<sup>TM</sup>, S= Surfactant

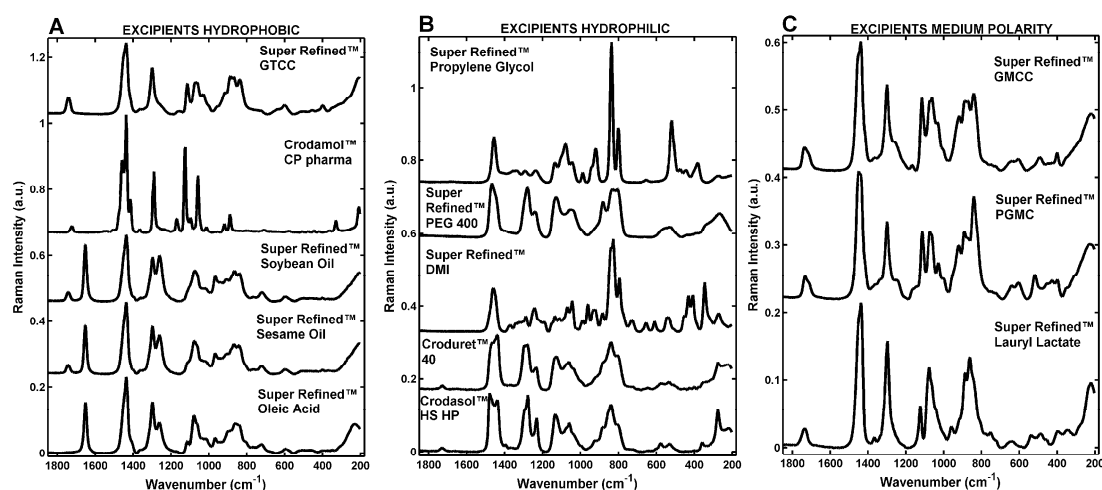

**Figure S1.** Raman spectrum of pure excipients that were classified as (A) hydrophobic, (B) hydrophilic and (C) medium polarity

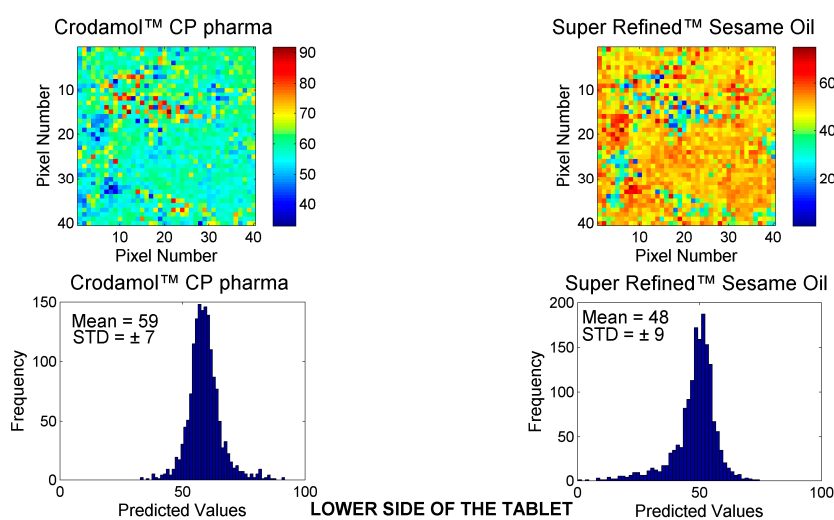

**Figure S2.** Chemical maps (replicate 1) obtained from the mixture of Crodamol<sup>TM</sup> CP pharma with Super Refined<sup>TM</sup> Sesame Oil in the 1:1 w/w ratio

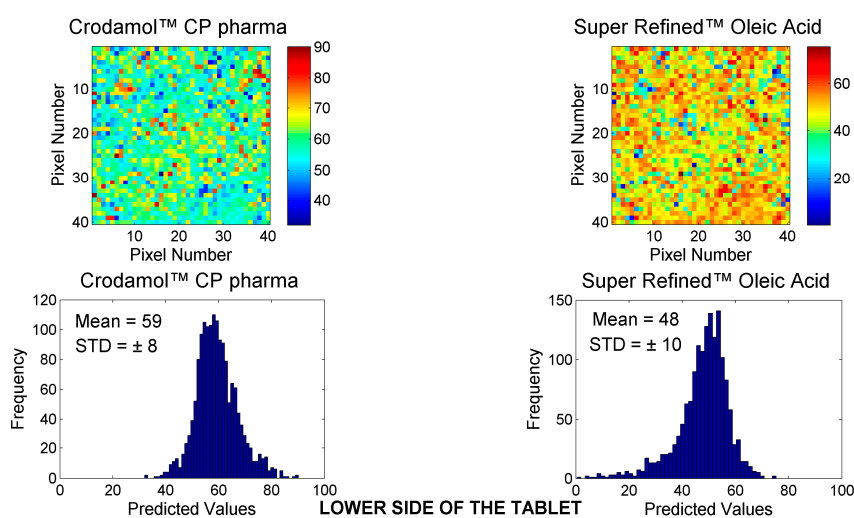

**Figure S3.** Chemical maps (replicate 1) obtained from the mixture of Crodamol™ CP pharma with Super Refined™ Oleic Acid in the 1:1 w/w ratio

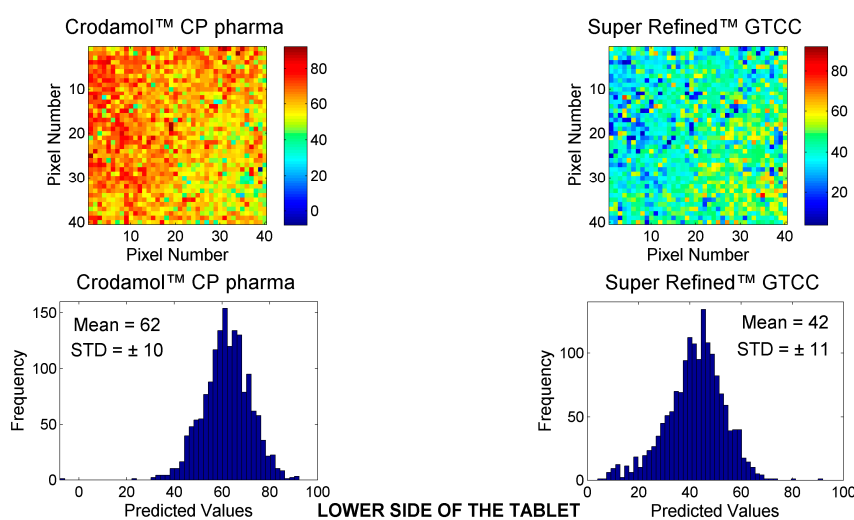

**Figure S4.** Chemical maps (replicate 1) obtained from the mixture of Crodamol™ CP pharma with Super Refined™ GTCC in the 1:1 w/w ratio

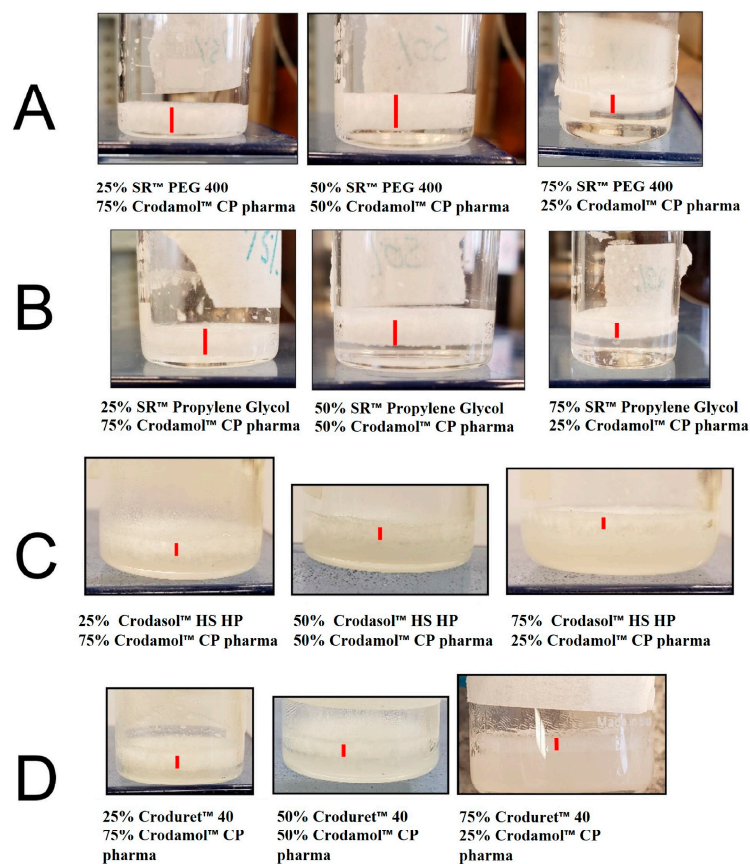

**Figure S5.** Preparation of tablets for excipients (A) Super Refined™ PEG 400, (B) Super Refined™ Propylene Glycol, (C) Crodasol™ HS HP, (D) Croduret™ 40 in proportions 1:1, 1:3 and 3:1 w/w

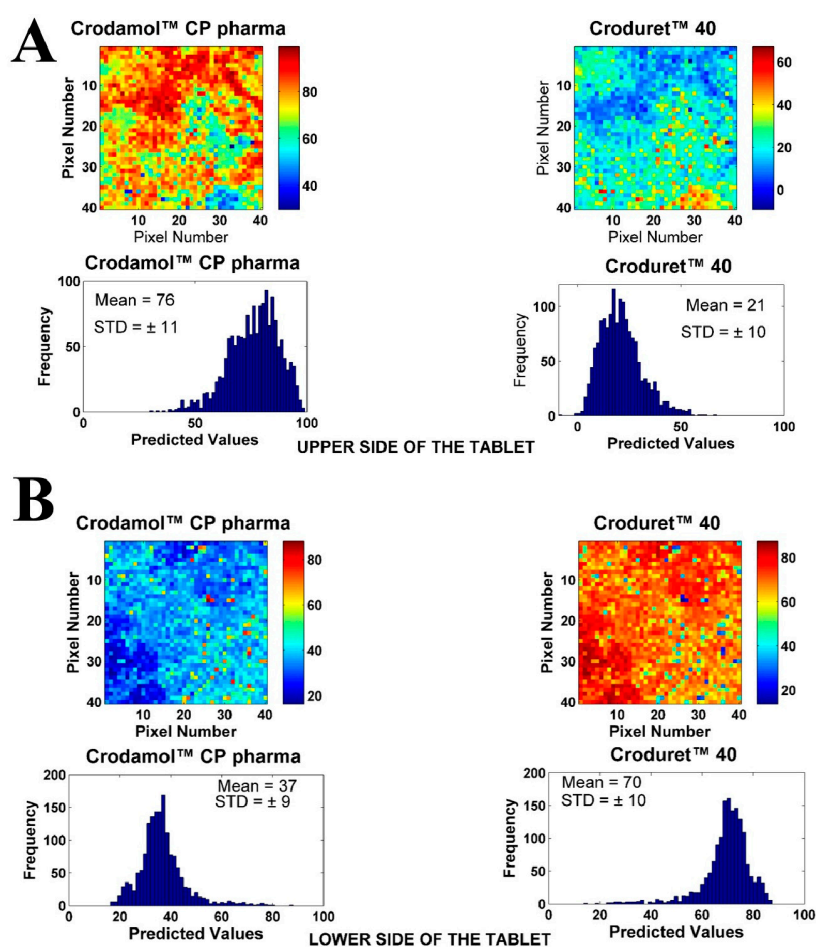

**Figure S6.** Chemical maps (replicate 1) obtained from (A) upper and (B) lower side of mixture between Crodamol™ CP pharma with Croduret™ 40 (in the 1:1 w/w ratio)

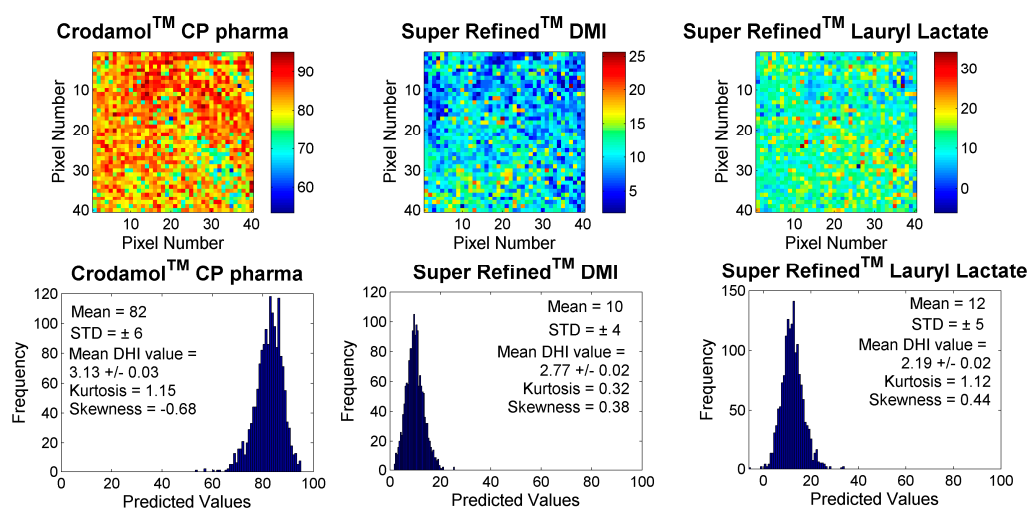

**Figure S7.** Chemical maps obtained from mixture design, Crodamol™ CP pharma (70% w/w), Super Refined™ DMI (10% w/w) and Super Refined™ Lauryl Lactate (10% w/w), replicate 1, point A

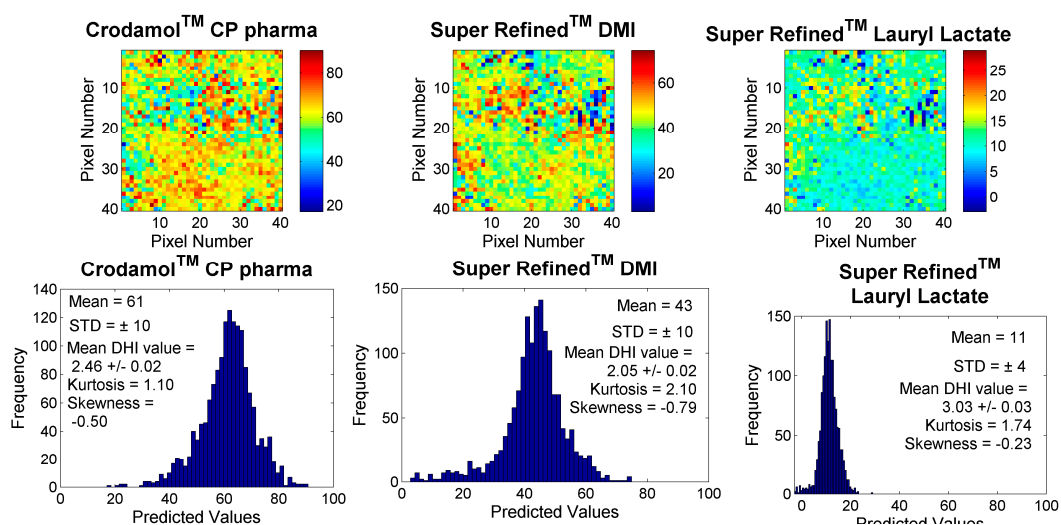

**Figure S8.** Chemical maps obtained from mixture design, Crodamol™ CP pharma (40% w/w), Super Refined™ DMI (40% w/w) and Super Refined™ Lauryl Lactate (10% w/w), replicate 1, point B

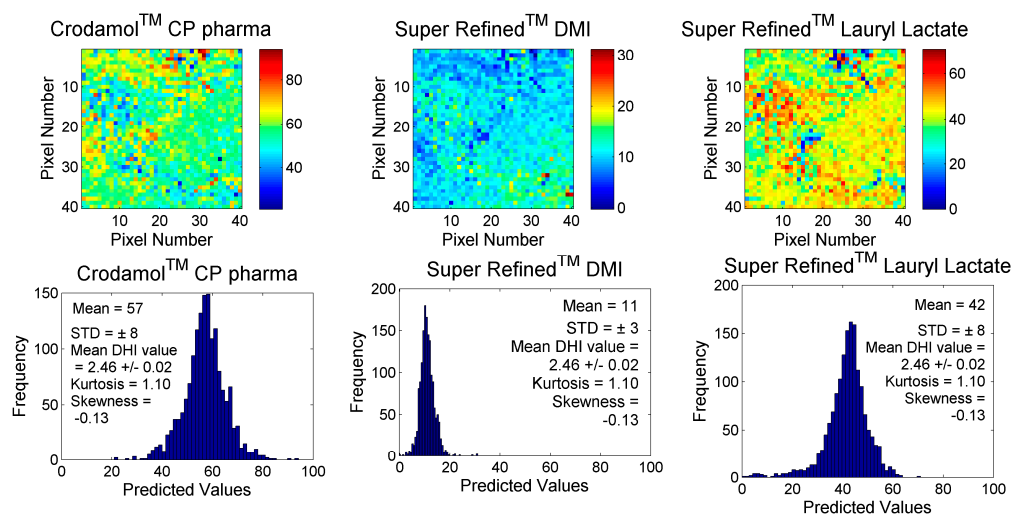

**Figure S9.** Chemical maps obtained from mixture design, Crodamol™ CP pharma (40% w/w), Super Refined™ DMI (10% w/w) and Super Refined™ Lauryl Lactate (40% w/w), replicate 1, point C

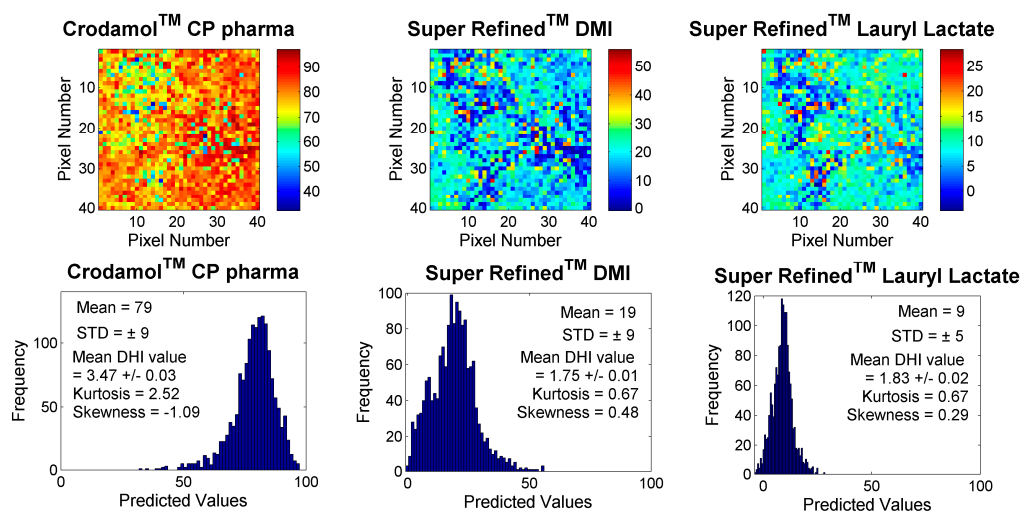

**Figure S10.** Chemical maps obtained from mixture design, Crodamol™ CP pharma (55% w/w), Super Refined™ DMI (25% w/w) and Super Refined™ Lauryl Lactate (10% w/w), point D

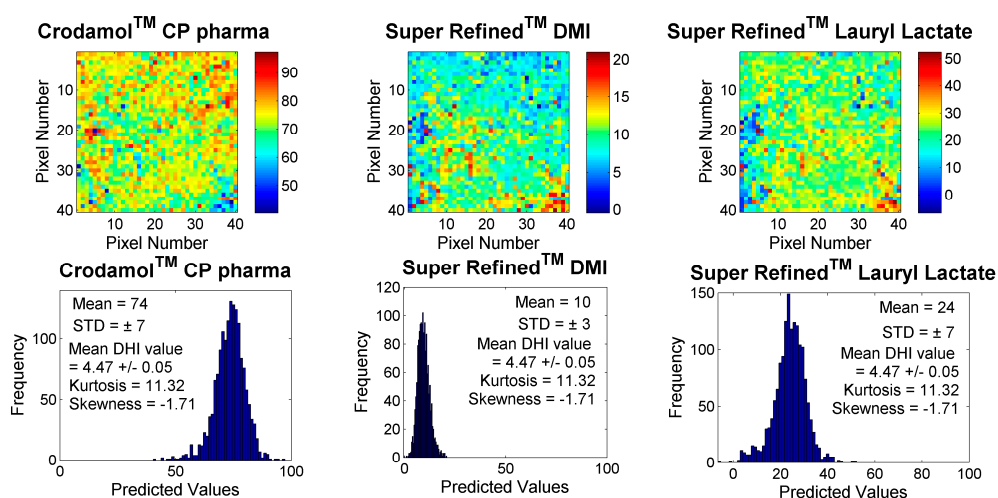

**Figure S11.** Chemical maps obtained from mixture design, Crodamol™ CP pharma (55% w/w), Super Refined™ DMI (10% w/w) and Super Refined™ Lauryl Lactate (25% w/w), point E

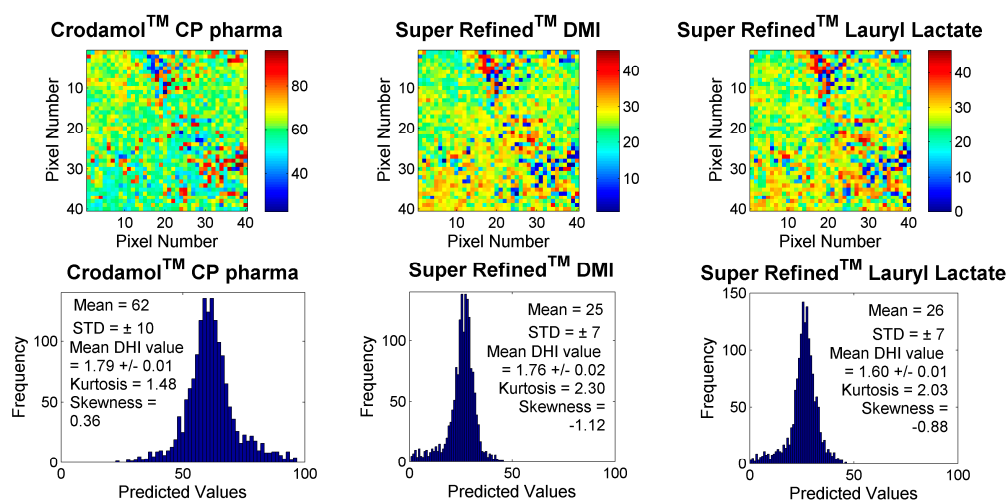

**Figure S12.** Chemical maps obtained from mixture design, Crodamol™ CP pharma (40% w/w), Super Refined™ DMI (25% w/w) and Super Refined™ Lauryl Lactate (25% w/w), point F



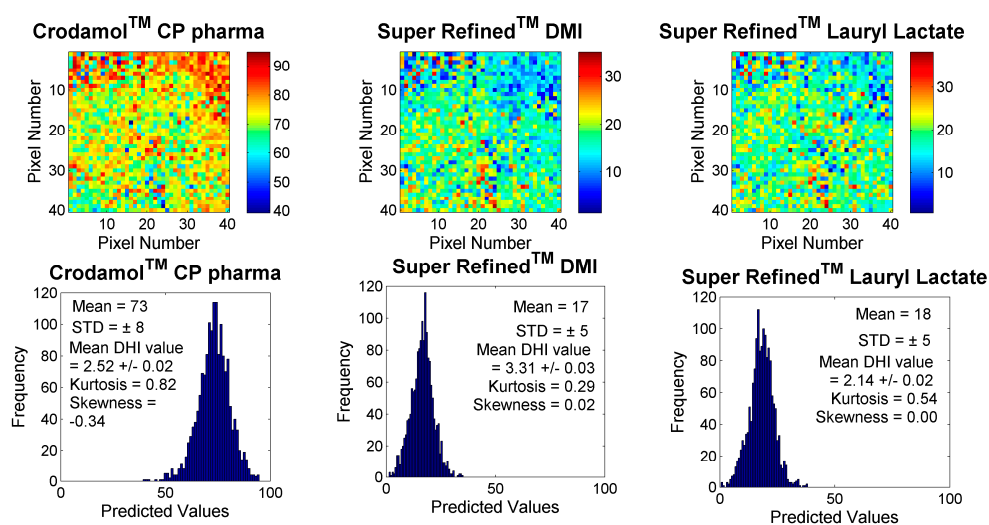

**Figure S13.** Chemical maps obtained from mixture design, Crodamol™ CP pharma (60% w/w), Super Refined™ DMI (15% w/w) and Super Refined™ Lauryl Lactate (15% w/w), point G

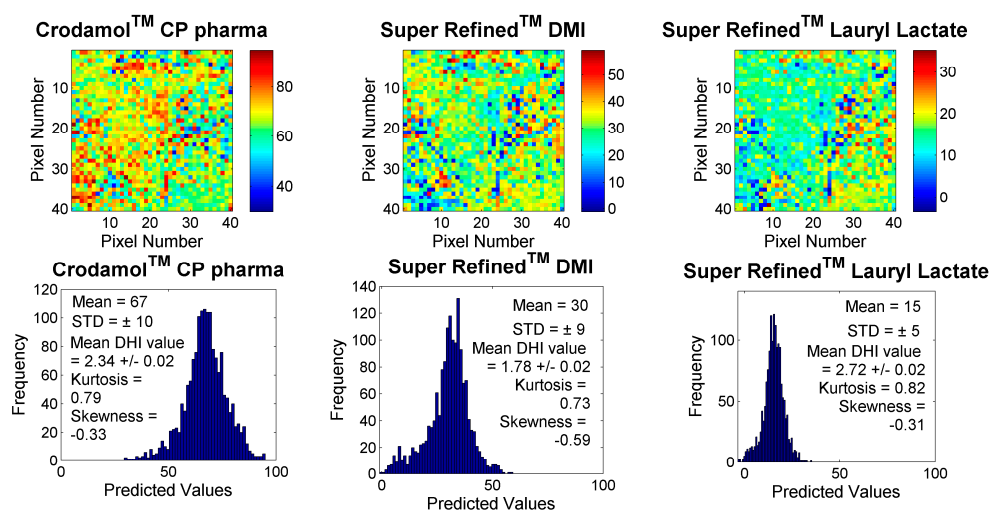

**Figure S14.** Chemical maps obtained from mixture design, Crodamol™ CP pharma (45% w/w), Super Refined™ DMI (30% w/w) and Super Refined™ Lauryl Lactate (15% w/w), point H

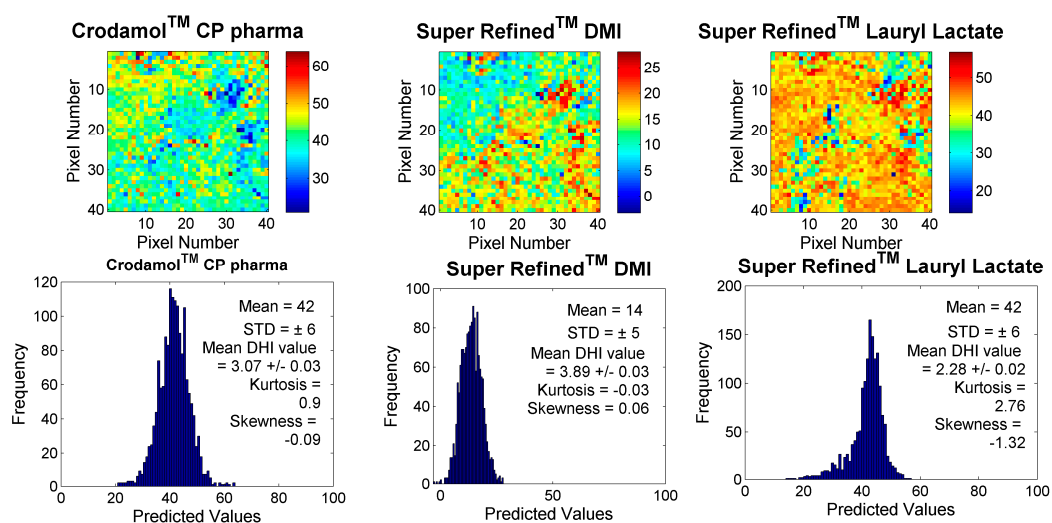

**Figure S15.** Chemical maps obtained from mixture design, Crodamol™ CP pharma (45% w/w), Super Refined™ DMI (15% w/w) and Super Refined™ Lauryl Lactate (30% w/w), point I

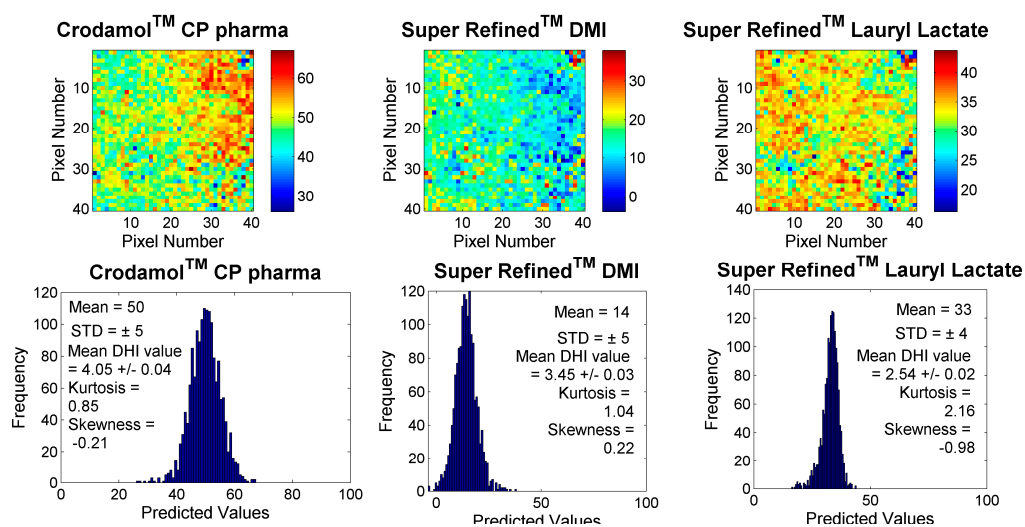

**Figure S16.** Chemical maps obtained from mixture design, Crodamol™ CP pharma (50% w/w), Super Refined™ DMI (20% w/w) and Super Refined™ Lauryl Lactate (20% w/w), replicate 1, point J

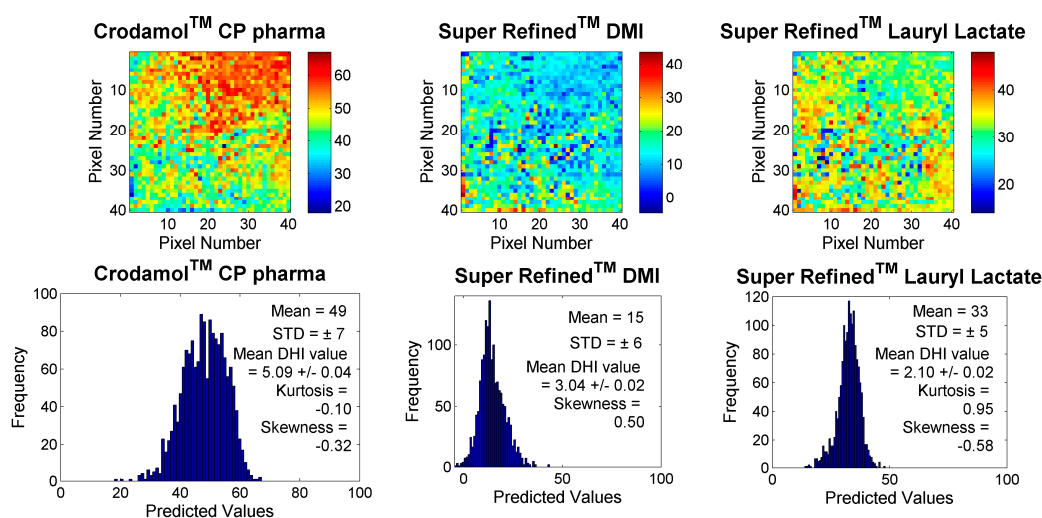

**Figure S17.** Chemical maps obtained from mixture design, Crodamol™ CP pharma (50% w/w), Super Refined™ DMI (20% w/w) and Super Refined™ Lauryl Lactate (20% w/w), replicate 2, point J

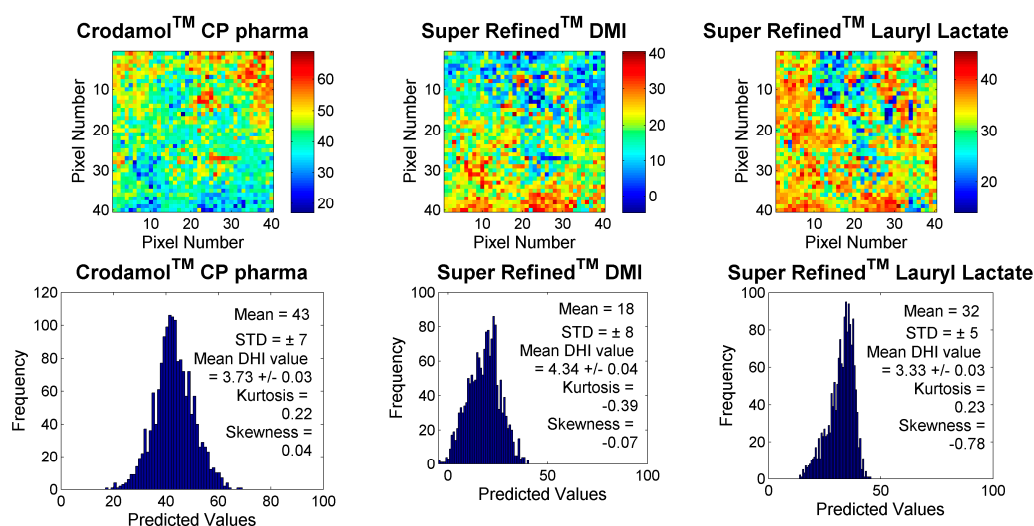

**Figure S18.** Chemical maps obtained from mixture design, Crodamol™ CP pharma (50% w/w), Super Refined™ DMI (20% w/w) and Super Refined™ Lauryl Lactate (20% w/w), replicate 3, point J

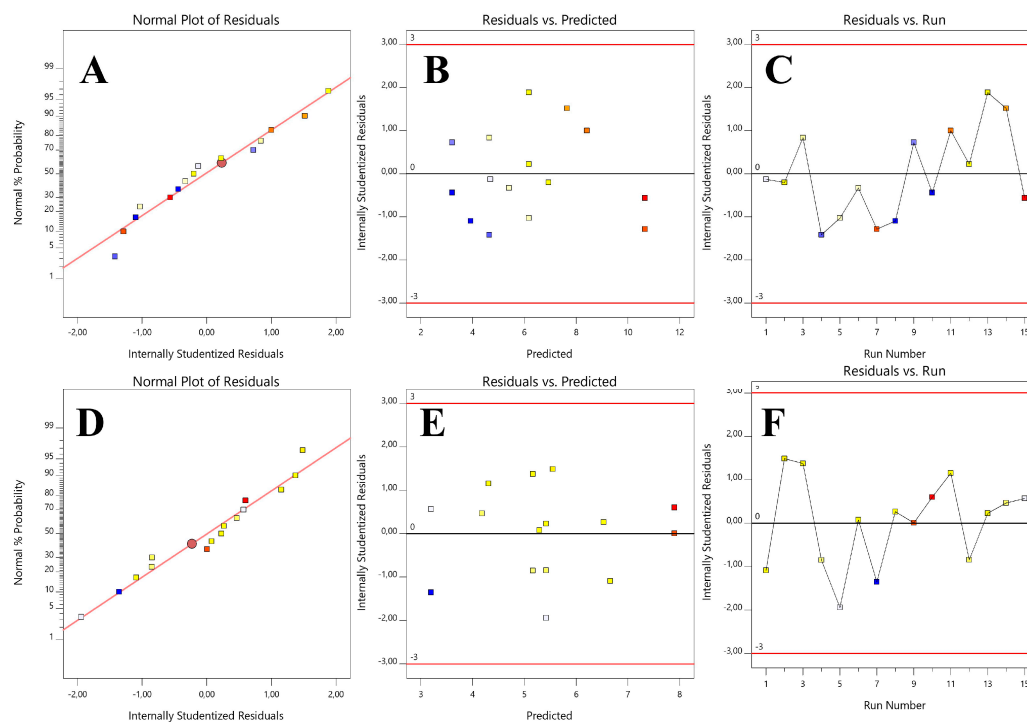

**Figure S19.** (A,D) Normal plot, (B,E) residuals vs. predicted and (C,F) residuals vs. run graph for responses  $Y_2$  (A, B and C) and  $Y_3$  (D, E and F)

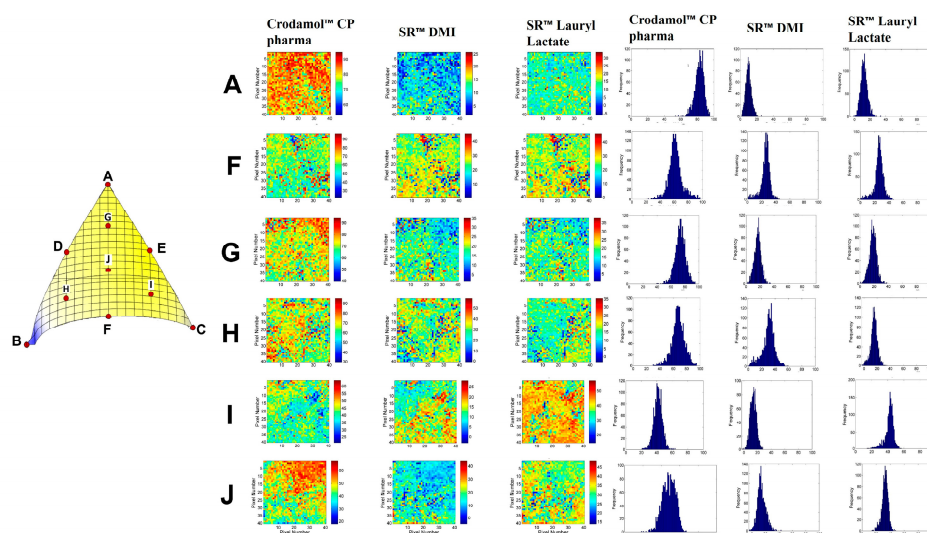

**Figure S20.** Chemical maps and histograms for the mixture design points A, F, G, H, I and J

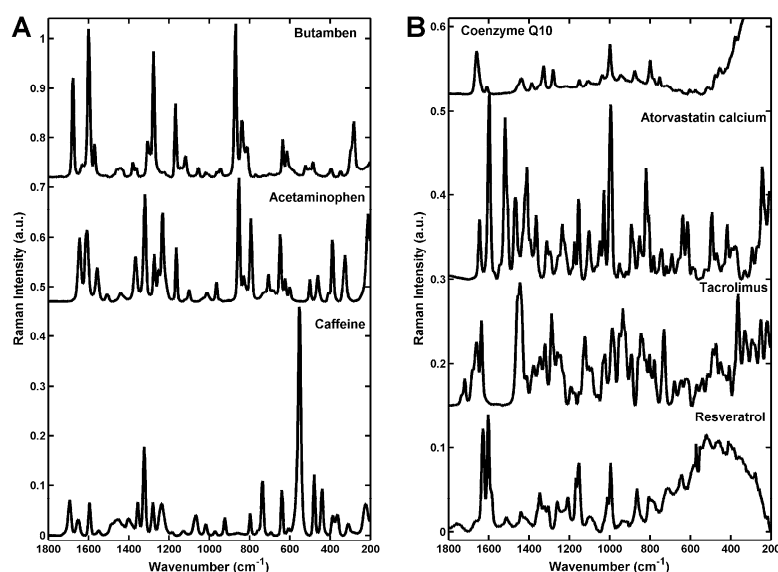

**Figure S21.** Raman spectra of the drugs (A) butamben, caffeine, acetaminophen and (B) coenzyme Q10, atorvastatin calcium, tacrolimus and resveratrol used in the study

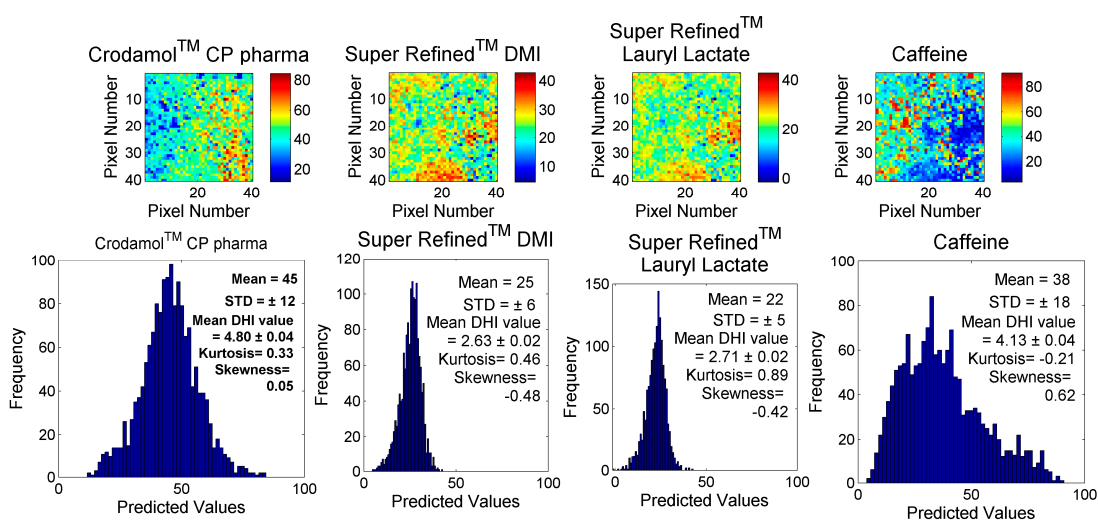

**Figure S22.** Chemical maps of the mixtures with the excipients Crodamol™ CP pharma (40 (% w/w)), SR™ DMI (25 (% w/w)) and SR™ Lauryl Lactate (25 (% w/w)) with the drug Caffeine, replicate 1

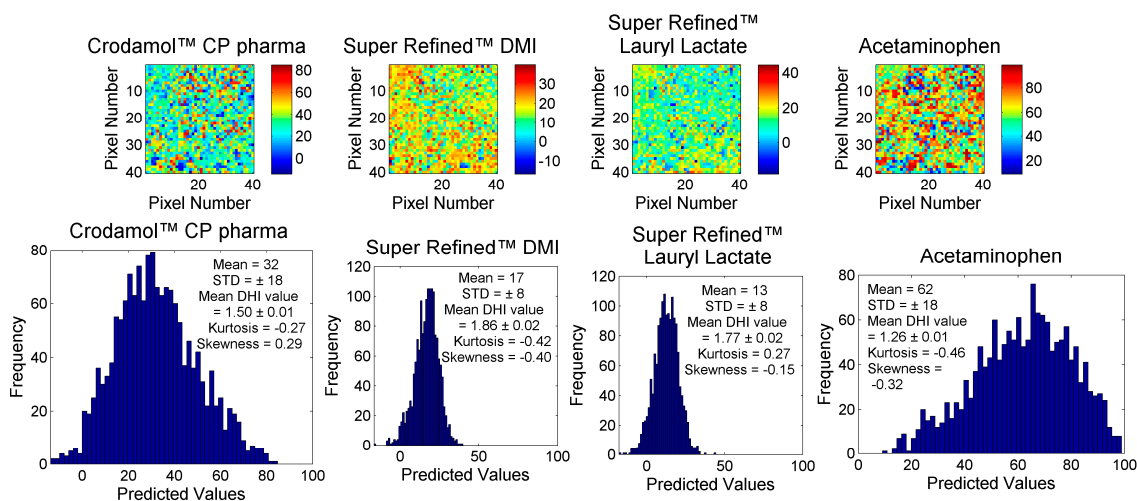

**Figure S23.** Chemical maps of the mixtures with the excipients Crodamol™ CP pharma (40 (% w/w)), SR™ DMI (25 (% w/w)) and SR™ Lauryl Lactate (25 (% w/w)) with the drug Acetaminophen, replicate 1

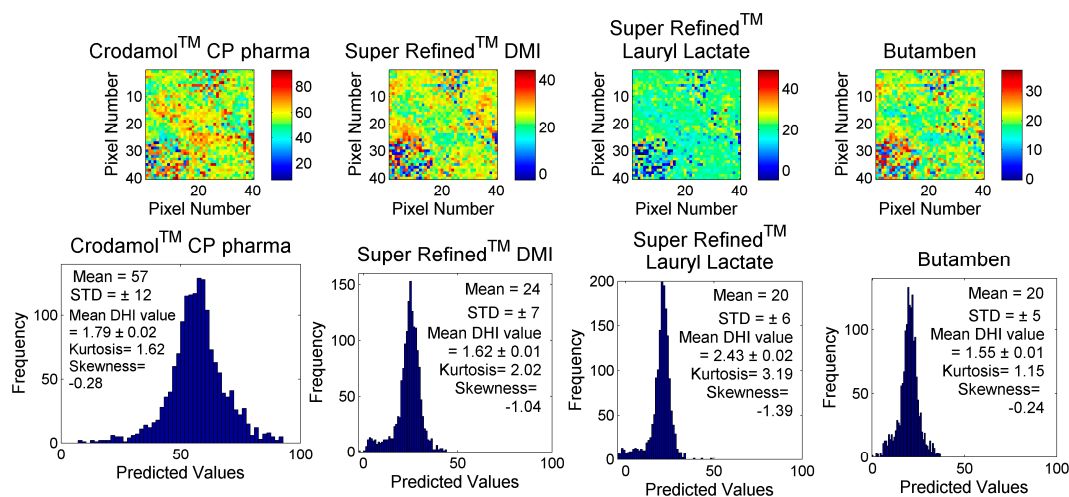

**Figure S24.** Chemical maps of the mixtures with the excipients Crodamol™ CP pharma (40 (% w/w)), SR™ DMI (25 (% w/w)) and SR™ Lauryl Lactate (25 (% w/w)) with the drug Butamben, replicate 1

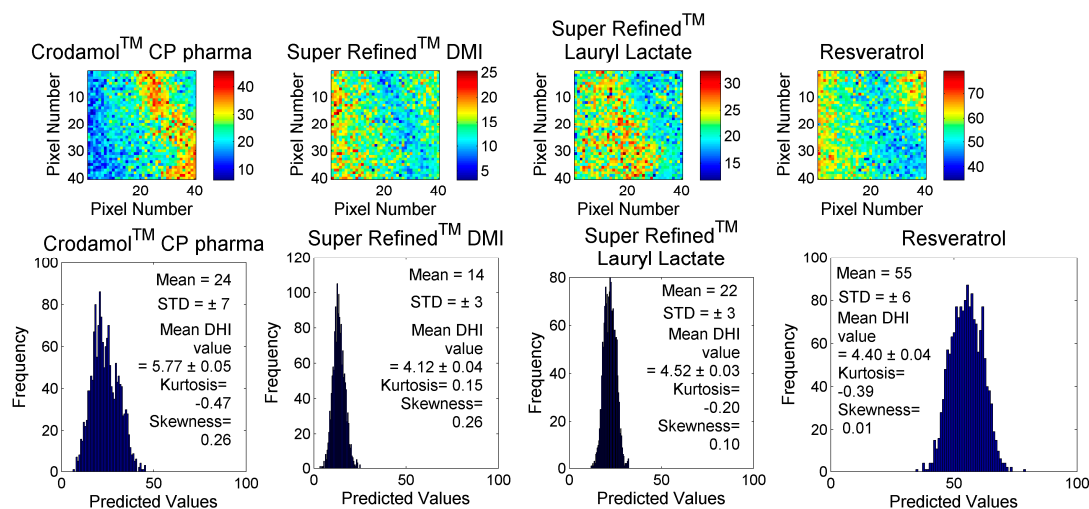

**Figure S25.** Chemical maps of the mixtures with the excipients Crodamol™ CP pharma (40 (% w/w)), SR™ DMI (25 (% w/w)) and SR™ Lauryl Lactate (25 (% w/w)) with the drug Resveratrol, replicate 1

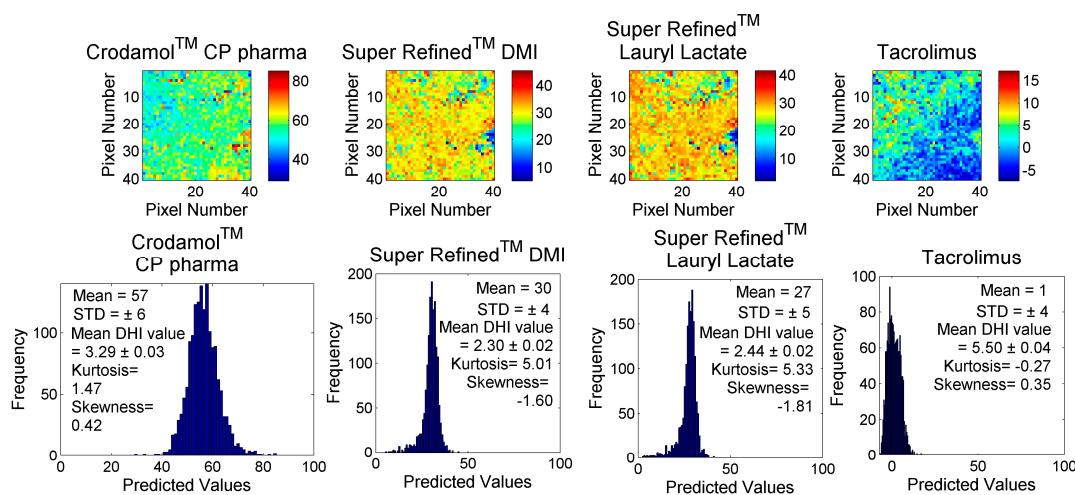

**Figure S26.** Chemical maps of the mixtures with the excipients Crodamol™ CP pharma (40 (% w/w)), SR™ DMI (25 (% w/w)) and SR™ Lauryl Lactate (25 (% w/w)) with the drug Tacrolimus, replicate 1

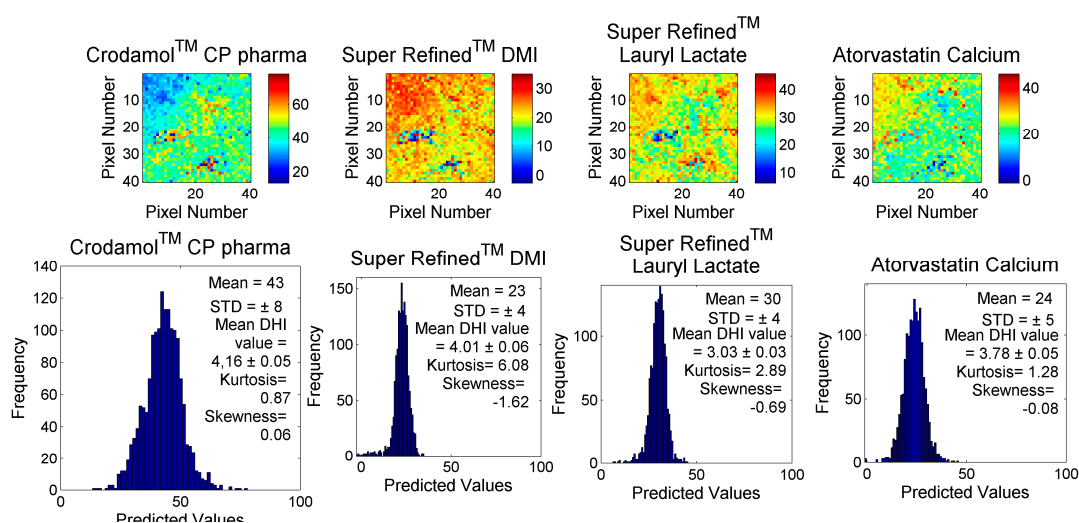

**Figure S27.** Chemical maps of the mixtures with the excipients Crodamol™ CP pharma (40 (% w/w)), SR™ DMI (25 (% w/w)) and SR™ Lauryl Lactate (25 (% w/w)) with the drug Atorvastatin Calcium, replicate 1

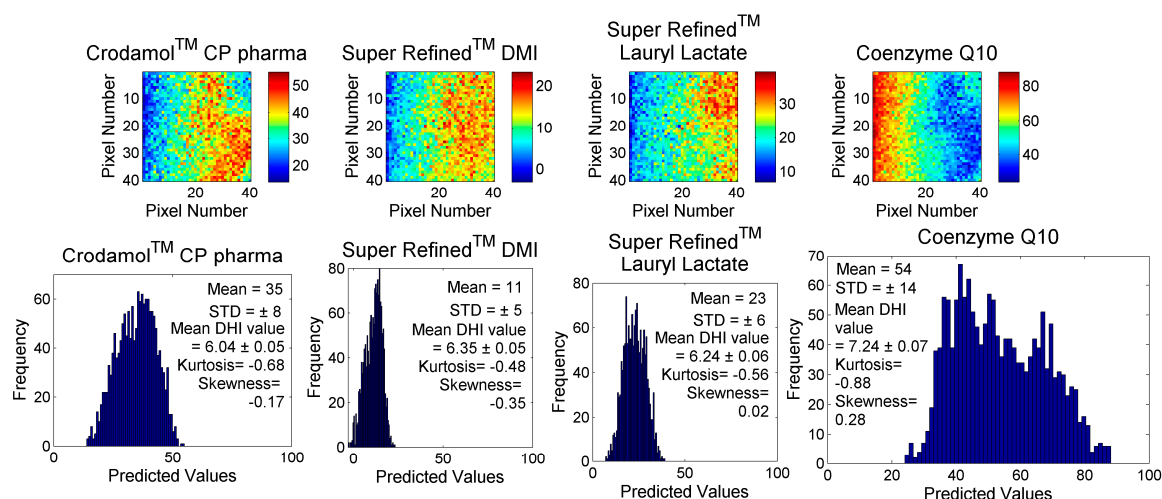

**Figure S28.** Chemical maps of the mixtures with the excipients Crodamol™ CP pharma (40 (% w/w)), SR™ DMI (25 (% w/w)) and SR™ Lauryl Lactate (25 (% w/w)) with the drug Coenzyme Q10, replicate 1



**Table S3.** Standard deviation, logP, and mean values of DHI and kurtosis for the evaluated drugs

| Drug                 | logP   | STD   | DHI mean | Kurtosis mean |
|----------------------|--------|-------|----------|---------------|
| Caffeine             | -0.070 | 16.83 | 2.81     | -0.20         |
| Acetaminophen        | 0.910  | 18.66 | 2.85     | -0.62         |
| Butamben             | 2.870  | 5.43  | 1.69     | 1.22          |
| Resveratrol          | 3.100  | 5.91  | 4.19     | 0.36          |
| Tacrolimus           | 3.300  | 4.06  | 4.89     | 0.73          |
| Atorvastatin calcium | 6.360  | 4.92  | 4.00     | 1.35          |
| Coenzyme Q10         | 10.000 | 12.82 | 6.57     | -0.55         |

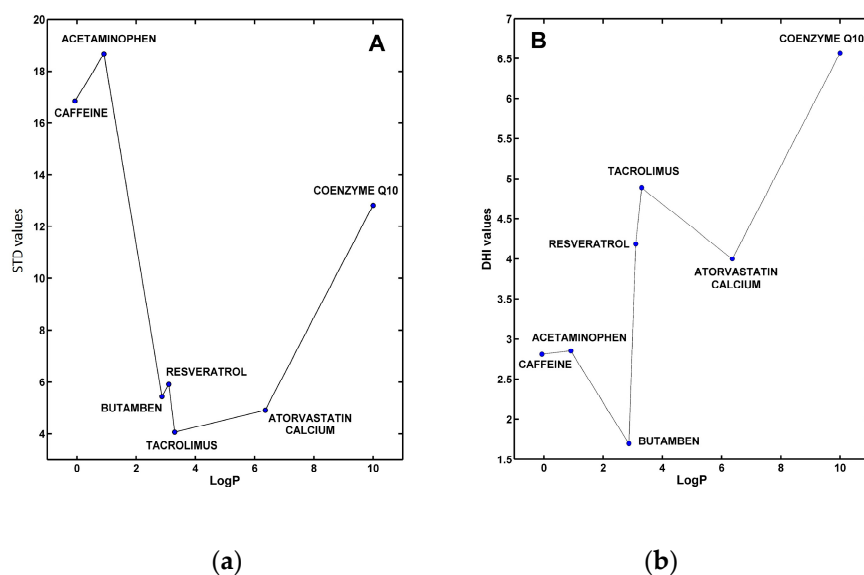**Figure S29.** Graph of LogP against (A) STD values and (B) DHI values for the evaluated drugs
